# Supplementary material for: DNA Barcoding for Species Assignment: The Case of Mediterranean Marine Fishes
Source: PubMed Central journal article supplement (PMC4164363; doi:10.1371/journal.pone.0106135), 2014-09-15
Supplement: pone.0106135.s001.pdf [file pone.0106135.s001.pdf]

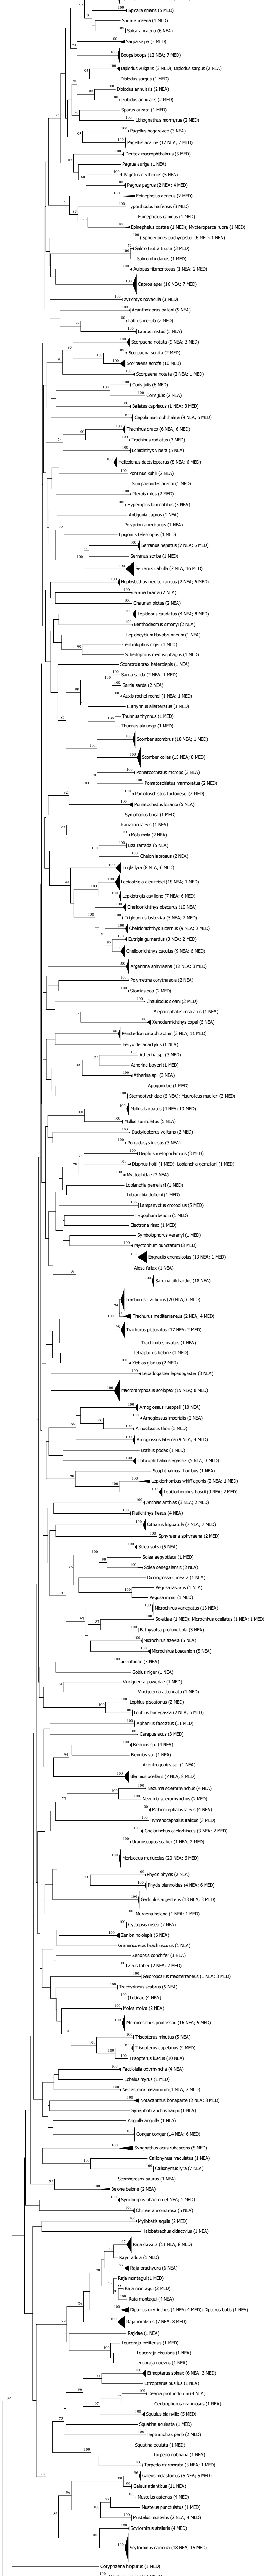

0.05
